# 1 **SQuIRE: Software for Quantifying Interspersed Repeat Elements**

2 Authors: Yang Wan R.<sup>1</sup>, Daniel Ardeljan<sup>1,2</sup>, Clarissa N. Pacyna<sup>1,3</sup>, Lindsay M. Payer<sup>1,6</sup>, Kathleen H.  
3 Burns<sup>1,3, 4,5,6</sup>

4 <sup>1</sup> Department of Pathology, Johns Hopkins University School of Medicine, Baltimore, Maryland, 21205,  
5 USA.

6 <sup>2</sup> McKusick-Nathans Institute of Genetics, Johns Hopkins University School of Medicine, Baltimore,  
7 Maryland, 21205, USA.

8 <sup>3</sup> Thomas C. Jenkins Department of Biophysics, Johns Hopkins University, Baltimore, Maryland, USA

9 <sup>4</sup> Department of Oncology, Johns Hopkins University School of Medicine, Baltimore, Maryland, USA.

10 <sup>5</sup> Sidney Kimmel Comprehensive Cancer Center, Johns Hopkins University School of Medicine,  
11 Baltimore, Maryland, USA.

12 <sup>6</sup> These authors contributed equally to this work.

13 Running Title: SQuIRE

14 Keywords: TE, retrotransposon, mobile element, RNA-seq alignment, differential expression  
15 analysis

16 Corresponding author: Kathleen H. Burns, M.D., Ph.D.

17 Johns Hopkins University School of Medicine

18 733 N. Broadway, MRB 447

19 Baltimore, MD 21205

20 [kburns@jhmi.edu](mailto:kburns@jhmi.edu)

21 410-502-7214

22        **Abstract:**

23        Transposable elements are interspersed repeat sequences that make up much of the human  
24 genome. Conventional approaches to RNA-seq analysis often exclude these sequences, fail to  
25 optimally adjudicate read alignments, or align reads to interspersed repeat consensus sequences  
26 without considering these transcripts in their genomic contexts. As a result, repetitive sequence  
27 contributions to transcriptomes are not well understood. Here, we present Software for  
28 Quantifying Interspersed Repeat Expression (SQuIRE), an RNA-seq analysis pipeline that  
29 integrates repeat and genome annotation (RepeatMasker), read alignment (STAR), gene  
30 expression (StringTie) and differential expression (DESeq2). SQuIRE uniquely provides a locus-  
31 specific picture of interspersed repeat-encoded RNA expression. SQuIRE can be downloaded at  
32 ([github.com/wyang17/SQuIRE](https://github.com/wyang17/SQuIRE)).

33        **Introduction**

34        Transposable elements (TEs) are self-propagating mobile genetic elements. Their insertions have  
35 resulted in a complex distribution of interspersed repeats comprising almost half of the human genome  
36 (Lander et al. 2001; Kazazian 2004). They propagated through either DNA ('transposons') or RNA  
37 intermediates ('retrotransposons')(Huang et al. 2012; Burns and Boeke 2012). Retrotransposons are  
38 further classified into Orders based on the presence of long terminal repeats (LTR retrotransposons) or  
39 whether they were long or short interspersed elements (LINEs and SINEs)(Wicker et al. 2007). Although  
40 most TEs have lost the capacity for generating new insertions over their evolutionary history and are now  
41 fixed in the human population, a subset of younger subfamilies from the LINE-1 superfamily (i.e., L1PA1  
42 or L1HS) (Beck et al. 2011), the SINE *Alu* superfamily (e.g., *AluYa5*, *AluYa8*, *AluYb8*, *AluYb9*)  
43 (Deininger 2011), and composite SVA (SINE-variable number tandem repeat (VNTR)-*Alu*) elements  
44 (Hancks et al. 2010) remain retrotranspositionally active and generate new polymorphic insertions  
45 (Stewart et al. 2011; Abecasis et al. 2012).

46 Due to the repetitive nature of TEs, short-read RNA sequences that originate from one locus can  
47 ambiguously align to multiple copies of the same subfamily dispersed throughout the genome. This  
48 problem is most significant for younger TEs; older elements have accumulated nucleotide substitutions  
49 over millions of years that can differentiate them and give rise to uniquely aligning TE reads (Giordano et  
50 al. 2007). Because of these barriers, conventional RNA-seq analyses of TEs have either discarded multi-  
51 mapping alignments (Chuong et al. 2013) or combined TE expression to the subfamily level (Criscione et  
52 al. 2014; Jin et al. 2015; Lerat et al. 2016). Other groups have studied active LINE-1s using tailored  
53 pipelines, leveraging internal sequence variation and 3' transcription extensions into unique sequence  
54 (Philippe et al. 2016; Deininger et al. 2017; Scott et al. 2016). However, these targeted approaches are  
55 unable to provide a comprehensive picture of TE expression.

56 To analyze global TE expression in conventional RNA-seq experiments, we have developed  
57 the Software for Quantifying Interspersed Repeat Elements (SQuIRE). SQuIRE is the first RNA-seq  
58 analysis pipeline available to date that quantifies TE expression at the locus level. In addition to RNA-seq  
59 providing expression estimations at the TE locus level, SQuIRE quantifies expression at the subfamily  
60 level and performs differential expression analyses on TEs and genes. We benchmark our pipeline using  
61 both simulated and experimental datasets and compare its performance against other software pipelines  
62 designed to quantify TE expression (Criscione et al. 2014; Jin et al. 2015; Lerat et al. 2016). SQuIRE  
63 provides a suite of tools to ensure the pipeline is user-friendly, reproducible, and broadly applicable.

## 64 **Results**

### 65 **SQuIRE Overview**

66 SQuIRE provides a suite of tools for analyzing transposable element (TE) expression in RNA-seq  
67 data (Fig. 1). SQuIRE's tools can be organized into four stages: 1) *Preparation*, 2) *Quantification*, 3)  
68 *Analysis* and 4) *Follow-up*. In the *Preparation* stage, **Fetch** downloads requisite annotation files for any  
69 species with assembled genomes available on University of California Santa Cruz (UCSC) Genome

70 Browser (Kent et al. 2002). These annotation files include RefSeq (Pruitt et al. 2014) gene information in  
71 BED and GTF format, and RepeatMasker (Smit, AFA, Hubley, R & Green) TE information in a custom  
72 format. **Fetch** also creates an index for the aligner STAR (Dobin et al. 2013) from chromosome FASTA  
73 files. **Clean** reformats TE annotation information from RepeatMasker into a BED file for downstream  
74 analyses. The tools in the *Preparation* stage only need to be run once per genome build. Because there are  
75 multiple RNA-seq aligners that can produce different results for TE expression estimation, the  
76 *Quantification* stage includes the alignment step **Map** to ensure reproducibility. **Map** aligns RNA-seq  
77 data using the STAR aligner with parameters tailored to TEs that allow for multi-mapping reads and  
78 discordant alignments. It produces a BAM file. **Count** quantifies TE expression using a SQuIRE-specific  
79 algorithm that incorporates both unique and multi-mapping reads. It outputs read counts and fragments  
80 per kilobase transcript per million reads (fpkm) for each TE locus, and aggregates TE counts and fpkm for  
81 TE subfamilies into a separate file. **Count** also quantifies annotated RefSeq gene expression with the  
82 transcript assembler StringTie (Pertea et al. 2015) to output annotated gene expression as fpkm in a GTF  
83 file, and as counts in a count table file. In the *Analysis* stage, **Call** performs differential expression  
84 analysis for TEs and RefSeq genes with the Bioconductor package DESeq2 (Love et al. 2014; Huber et al.  
85 2015). To allow users to visualize alignments to TEs of interest visualized by the Integrative Genomics  
86 Viewer (IGV)(Robinson et al. 2011) or UCSC Genome Browser, the *Follow-up* stage tool **Draw** creates  
87 bedgraphs for each sample. **Seek** retrieves sequences for genomic coordinates supplied by the user in  
88 FASTA format.

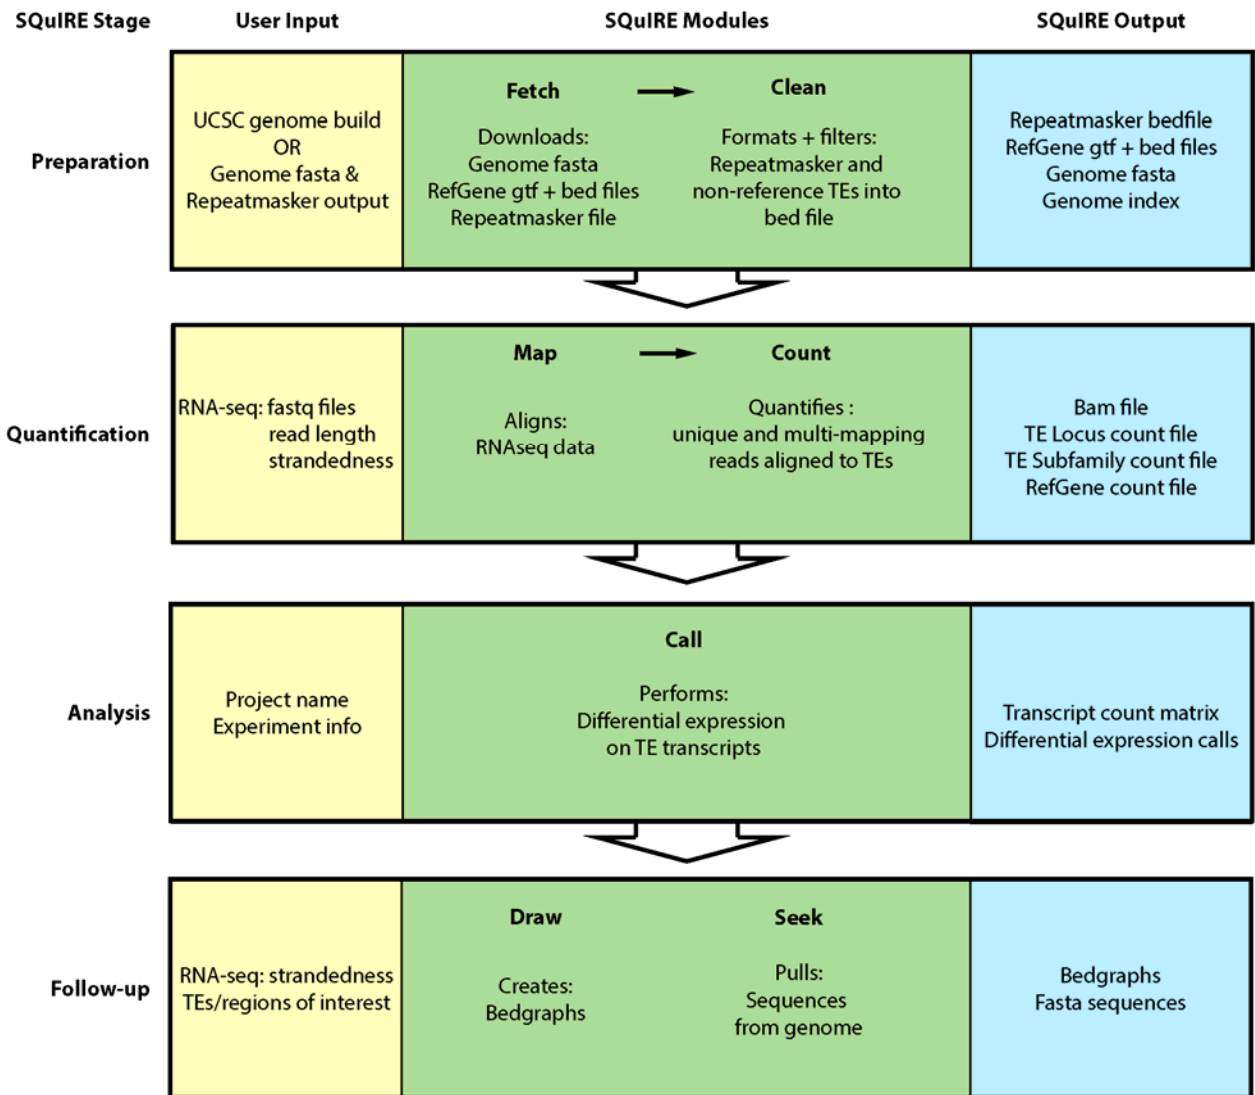

89  
90

**Figure 1.** Schematic overview of SQIRe pipeline.

## 91 **Count Algorithm**

92 SQuIRE's **Count** algorithm addresses a fundamental issue with quantifying reads mapping to TEs:  
93 shared sequence identity between TEs from the same subfamily and even superfamily. When a read  
94 fragment originating from these non-unique regions is aligned back to the genome, the read may  
95 ambiguously map to multiple loci ("multi-mapped reads"). This is not a major problem for older elements  
96 that have acquired relatively many nucleotide substitutions, and thus give rise to primarily uniquely  
97 aligning reads ("unique reads"). However, TEs from recent genomic insertions that have high sequence  
98 similarity to other loci may have few distinguishing nucleotides. Among elements of approximately the  
99 same age, relatively shorter TEs also have fewer sequences unique to a locus. Thus, discarding or  
100 misattributing multi-mapped reads can result in underestimation of TE expression.

101 Previous TE RNA-seq analysis pipelines have been able to quantify TE expression at subfamily-level  
102 resolution. The software RepEnrich (Criscione et al. 2014) "rescued" multi-mapping reads by re-aligning  
103 them to repetitive element pseudogenome assemblies of TE loci and assigning a fractional value inversely  
104 proportional to the number of subfamilies to which each read aligned. These multi-mapped fractions were  
105 combined with counts of unique reads aligned to each subfamily. This approach was an advance in that it  
106 used information from multi-mapped reads. However, this method results in assigning fractions that are  
107 proportional to the number of subfamilies that share the multi-mapped read's sequence, rather than each  
108 subfamily's approximate expression level. Tetranscripts (Jin et al. 2015) expanded on this rescue method  
109 by assigning an initial fractional value inversely proportional to the number of TE loci (not subfamilies)  
110 to which each read aligned. This initial fractional value was then used in an expectation-maximization  
111 (EM) algorithm, which iteratively re-distributes fractions of a multi-mapping read among loci (E-step) in  
112 proportion to their relative multi-mapped read abundance estimated from a previous step (M-step). The  
113 total of multi-mapped reads and unique reads for each loci are then summed by subfamily. However, in  
114 excluding unique reads from the EM algorithm, Tetranscripts does not incorporate empirical high-  
115 confidence data to infer TE expression levels from unique TE alignments. Furthermore, in calculating the

116 relative expression level of multi-mapped reads, Tetranscripts normalizes read counts based on annotated  
117 coordinates from RepeatMasker. This underestimates TE expression levels for transcripts shorter than the  
118 annotated genomic length. Tetranscripts then sums the unique and multi-mapping counts for each  
119 subfamily.

120 In order to accurately quantify TE RNA expression at locus resolution, **Count** builds on these  
121 previous methods by leveraging unique read alignments to each TE to assign fractions of multi-mapping  
122 reads (Fig. 2). First, **Count** identifies reads that map to TEs (by at least 50% of the read length) and labels  
123 them as “unique reads” or “multi-mapped reads.” Second, **Count** assigns fractions of a read to each TE as  
124 a function of the probability that the TE gave rise to that read. Uniquely aligning reads are considered  
125 certain (e.g., probability = 100%, count = 1). **Count** initially assigns fractions of multi-mapping reads to  
126 TEs in proportion to their relative expression as indicated by unique read alignments. In doing so, **Count**  
127 also considers that TEs have varying uniquely alignable sequence lengths. To mitigate bias against the  $n$   
128 number of TEs without uniquely aligning reads, these TEs receive fractions inversely proportional to the  
129 number of loci ( $N$ ) to which each read aligned. Then **Count** assigns the remainder  $(1 - \frac{n}{N})$  to the TEs  
130 with unique reads. To account for TEs that have fewer unique counts due to having less unique sequence,  
131 **Count** normalizes each unique count ( $C_U$ ) to the number of individual unique read start positions, or each  
132 TE’s uniquely alignable length ( $L_U$ ). Among all TEs to which a multi-mapping read aligned, the TEs with  
133 unique reads ( $s \in T$ ) are compared with each other. A fraction of a read is assigned to each TE in  
134 proportion to the contribution of the normalized unique count ( $\frac{C_U}{L_U}$ ) to the combined normalized unique  
135 count of all of the TEs being compared ( $\sum_{s \in T} \frac{C_S}{L_S}$ ). (Equation 1). The sum of unique counts and multi-  
136 mapped read fractions for each TE provides an initial estimate of TE read abundance based on empirically  
137 obtained unique read counts and uniquely alignable sequence.

138 
$$f_{TE}^r = \frac{\frac{C_U}{L_U}}{\sum_{s \in T} \frac{C_S}{L_S}} \times (1 - \frac{n}{N}) \quad \text{Equation 1}$$

139 Multi-mapping read assignment to TEs without unique reads is thus initially based on the numbers of  
140 valid alignments for each read. **Count** next refines this initial assignment by redistributing multi-mapping  
141 read fractions in proportion to estimated TE expression. To estimate expression, **Count** uses the a TE's  
142 total read count ( $C_{TE} = \text{unique read counts} + \text{multi-mapped fractions from the previous step}$ ) normalized  
143 by the effective transcript length ( $l_{TE}$ ):  $\frac{C_{TE}}{l_{TE}}$ . The effective transcript length  $l_{TE}$  is calculated as the  
144 estimated transcript length  $L_{TE}$  subtracted by the average fragment length aligned to that TE + 1 ( $l_{TE} =$   
145  $L_{TE} - l_{avg} + 1$ ), as described previously (Li et al. 2010). All of the TEs to which a multi-mapping read  
146 aligned ( $s \in T$ ) are compared with each other. A fraction of a read is assigned to each TE in proportion  
147 to the relative normalized total count ( $\frac{C_{TE}}{l_{TE}}$ ) compared to the combined normalized total count of all of the  
148 TEs being compared ( $\sum_{s \in T} \frac{T_s}{l_s}$ ), as shown in Equation 2. **Count** assumes this value is proportional to the  
149 probability that the TE gave rise to the multi-mapping read, and assigns that fraction of a read count to the  
150 TE. Because TEs with a count fraction of less than 1 have a low probability of giving rise to any read,  
151 those TEs are assigned a count fraction of 0.

152 
$$f_{TE}^r = \frac{\frac{C_{TE}}{l_{TE}}}{\sum_{s \in T} \frac{T_s}{l_s}} \quad \text{Equation 2}$$

153 After the total counts (unique and multi-mapped) of each TE are re-calculated, multi-mapped reads  
154 can be re-assigned in subsequent iterations of expectation (assigning multi-mapped read fractions to TEs)  
155 and maximization (summation of unique and multi-mapped fraction counts). These iterations can be  
156 repeated until a given iteration number set by the user or until the TE counts converge (“auto”, when all  
157 of the TEs with  $\geq 10$  counts change by  $< 1\%$ ). An example of **Count** output is provided in Supplemental  
158 Table S1. Further details of the **Count** algorithm are in Supplemental Methods.



159

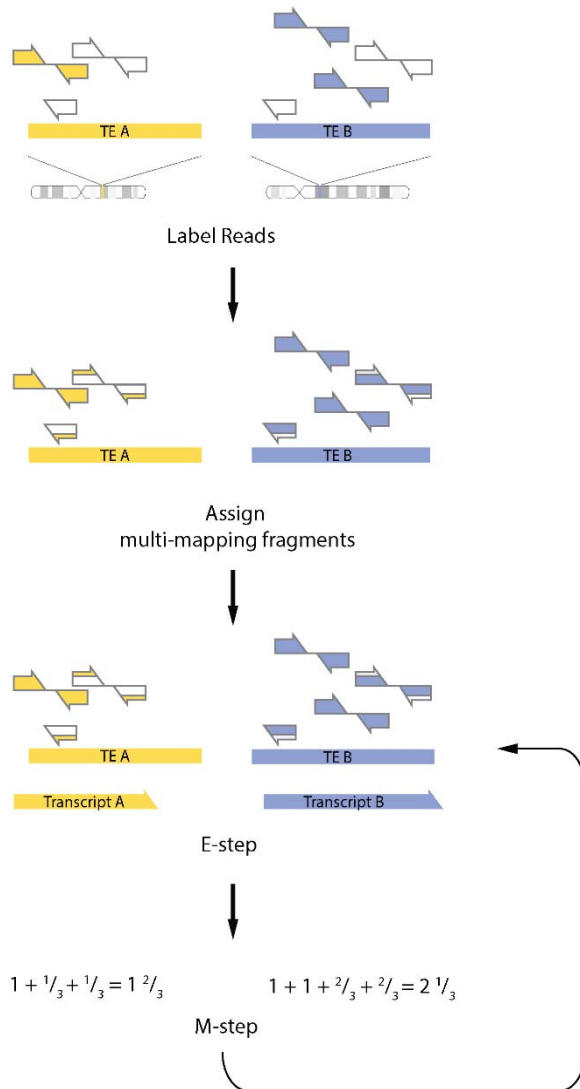

**Figure 2.** Schematic representation of the SQUIRE **Count** algorithm. First, **Count** labels reads as unique (filled arrows) or multi-mapping (empty arrows). Second, **Count** assigns fractions of multi-mapping reads in proportion to the normalized unique read expression of each TE. The partially filled arrows reflect the proportion of the read assigned to the TE of the corresponding color. Then, **Count** runs an Expectation-Maximization loop that estimates transcript length and reassigns multi-mapping reads for each TE (E-step), then re-estimates total read counts (M-step) until convergence.

## 160 **Assessing Count Accuracy in simulated data**

161 To test the performance of **Count**, we simulated RNA-seq data from 100,000 randomly selected TEs  
162 from the human GRCh38/hg38 (hg38) RepeatMasker annotation (see Methods). TEs were simulated with  
163 read coverages of ranging from 2-4000X and simulated counts ranging from 2-4588. We first evaluated  
164 accuracy by how closely SQuIRE **Count** output corresponded to the simulated read counts (i.e., %  
165 Observed/Expected). However, using this calculation is not meaningful for TEs with low simulated  
166 counts: a TE with 0 counts gives an infinite value, and a reported count of 1 for a TE with 2 simulated  
167 reads gives a low 50% Observed/Expected. Thus, we were primarily interested in ‘expressed’ simulated  
168 TEs, considering only the 99,567 TEs with at least 10 simulated reads. Second, we evaluated SQuIRE by  
169 how often it correctly detected simulated TE expression (i.e., true positives) or misreported unexpressed  
170 TEs (i.e., false positives).

171 To test how well SQuIRE performed leveraging only uniquely aligning read information, we first  
172 evaluated the % Observed/Expected of TE counts with 0 E-M iterations. We found that SQuIRE  
173 accurately assigned read counts to most TEs, with a mean % Observed/Expected of 98.79%  
174 (Supplemental Fig. S1). We predicted that this accuracy would be lower for TEs with less uniquely  
175 alignable sequence. Indeed, SQuIRE was less accurate for elements with less than 10% divergence (mean  
176 of 77.35 % Observed/Expected). The most frequently retrotranspositionally active TEs (i.e., *AluYa5*,  
177 *AluYa8*, *AluYb8*, *AluYb9*, and L1HS) had counts ranging from 48-70% Observed/Expected, with a range  
178 of 79-92% Observed/Expected at the subfamily level (Supplemental Table S2). This illustrates that even  
179 without the EM-algorithm, SQuIRE is sensitive for highly homologous subfamilies at the subfamily level.

180 Given the low recovery of simulated counts for younger elements when relying solely on uniquely  
181 aligning reads, we next evaluated how much adding the EM-algorithm improved **Count’s** performance.  
182 We anticipated that the counts for most TEs would not change, but that younger elements with less  
183 divergence would have improved recovery of simulated reads. Indeed, the overall % Observed/Expected  
184 counts of TE loci increased only slightly by 0.14% to a total of 98.93%. However, the change in %

185 Observed/Expected of TEs was much greater for the most homologous active elements, improving by  
186 20.47% for young *Alu* elements and by 21.1% for L1HS loci (Fig. 3). At the subfamily level, the %  
187 Observed/Expected of active TEs was improved by 8.1% for young *Alu* elements and by 2.2% for L1HS  
188 (Supplemental Table S2). Using updated transcript information in the EM-algorithm is thus particularly  
189 useful for TE biologists interested in younger elements that have previously been problematic to quantify  
190 by RNA-seq.

191 We also wanted to evaluate SQuIRE's ability to distinguish whether a TE is expressed or not. To  
192 examine how well **Count** detected expressed TEs, we calculated the true positive rate (TPR) as the  
193 percentage of TEs with at least 10 simulated reads that SQuIRE also reported to have  $\geq 10$  counts.  
194 Conversely, we evaluated how often SQuIRE falsely reports TE expression by calculating the positive  
195 predictive value (PPV) as the percentage of TEs with  $\geq 10$  reported counts that were in fact simulated to  
196 have  $\geq 10$  reads. The true negative rate, or how often SQuIRE correctly reports that a TE is *not* expressed,  
197 is less informative for evaluating TE estimation accuracy because the number of TEs in the hg38 genome  
198 is so high (>4 million TEs) that the true negative value would outweigh the false positive value (Saito and  
199 Rehmsmeier 2015). Overall, SQuIRE had both a high TPR of 98.5% and high PPV of 99.4%. These  
200 values were lower for frequently retrotranspositionally active *Alus* (TPR=68.75-83.33%, PPV= 64.29-  
201 100% ) and L1HS (TPR=100%, PPV=62.86%) using only unique reads for TE expression estimation  
202 (Supplemental Table S3). However, using the EM algorithm improved the TPR for *Alus* (TPR=85.22%-  
203 100%) by reducing false negative reports and the PPV for L1HS (PPV=78.57%) by reducing false  
204 positives.

205

206

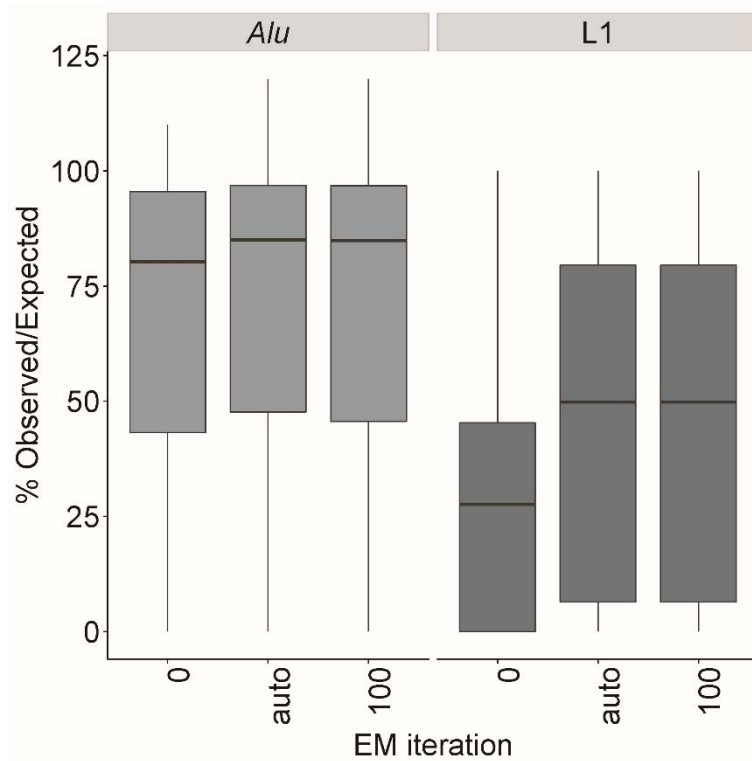

**Figure 3.** Running EM iterations improves the % Observed/Expected for SQuIRE **Count** for the frequently retrotranspositionally active *Alu* (*AluYa5*, *AluYa8*, *AluYb8*, *AluYb9*) and L1 (L1HS) subfamilies compared to no EM iterations ( $i=0$ ), and does not degrade with increasing iterations ( $i=100$ ). By default ( $i="auto"$ ), SQuIRE **Count** continues the EM-algorithm until each TE with more than 10 reported read counts changes by less than 1%.

## 207 **Endogenous LINE-1 detection with Count**

208 To assess **Count**'s ability to detect endogenous LINE-1 expression using biological data, we  
209 evaluated the expression level of L1 at loci previously characterized by other methods. Because L1s often  
210 become 5' truncated upon insertion (Perepelitsa-Belancio and Deininger 2003), Deininger et al.  
211 performed 5' rapid amplification of cDNA ends (RACE) on cytoplasmic HEK293 RNA to enrich for full-  
212 length L1 RNA. They also performed RNA-seq on polyA-selected cytoplasmic HEK293 RNA to identify  
213 L1 loci that have downstream polyadenylation signal. We filtered their findings for L1 loci that had > 5  
214 mapped RNA-seq reads from both 5'RACE and poly-A selected RNA libraries (Deininger et al. 2017) to  
215 compare with SQUIRE. We then examined the expression reported by SQUIRE at these 33 loci in paired-  
216 end, total RNA from HEK293T cells (GSE113960). We found that 31 (93.4%) had > 10 SQUIRE read  
217 counts, confirming their expression (Supplemental Table S4). This suggests that **Count** can detect L1  
218 expression in RNA-seq libraries that are not enriched for L1 loci.

219 Only a subset of the L1s evaluated by Deininger et al. belonged to L1HS, the youngest family of L1s.  
220 Because L1HS loci can be retrotranspositionally active, they can generate insertions that are  
221 polymorphic or novel compared to the the reference human RepeatMasker annotation. Reads from TE  
222 insertions that are not present in the RepeatMasker annotation can be misattributed to unexpressed, fixed  
223 TEs, which can result in "false positive" reports of expression at silent loci. To test how this affects  
224 **Count**, we transfected HEK293T cells with an empty pCEP4 plasmid or with a plasmid containing L1RP,  
225 an L1HS with known retrotransposition activity (Schwahn et al. 1998; Kimberland et al. 1999). The  
226 transfection of L1RP resulted in increased L1HS-aligning reads (254,681 reads) compared to L1HS loci  
227 in L1RP-negative cells (2,671 reads) (Supplemental Fig. S2). The differences in L1HS expression in  
228 L1RP-transfected cells was higher than what we would expect from endogenous, polymorphic insertions  
229 based on previous estimates of polymorphic and fixed L1HS expression in HEK293T cells using unique  
230 reads within 1kb downstream of L1HS loci (Philippe et al. 2016). Because Philippe et al. suggested that  
231 polymorphic L1HS insertions were transcribed at levels similar to fixed full-length L1HS loci, we sought

232 to mimic polymorphic L1HS expression levels more consistent with previously reported levels. To  
233 determine comparable fixed L1HS expression levels in our control HEK293T RNA-seq data, we  
234 examined the **Count** output at loci with reported expression by Phillippe et al. (145 read counts). We then  
235 downsampled the L1RP-aligning reads from L1RP transfected HEK293T cells to a similar number (153  
236 reads). To simulate a range of polymorphic L1HS expression levels, we also downsampled RNA-seq  
237 reads that aligned to the L1RP plasmid to 2X and 20X the fixed active L1HS expression level (302 and  
238 3,091 reads). For these downsampled reads, we identified their other, off-target alignments to the  
239 reference genome. To control for potential biological effects of L1RP transfection on TE counts, we  
240 ‘spiked in’ these downsampled reads from L1RP-transfected cells into RNA-seq data from HEK293T  
241 cells transfected with an empty pCEP4 plasmid. We then calculated the number of false positive L1 loci  
242 that became ‘expressed’ with > 10 counts after the *in silico* spike-in. We focused on the 3 youngest L1  
243 subfamilies that share the greatest homology with the L1RP sequence (i.e., L1HS or L1PA1, L1PA2, and  
244 L1PA3) (Smit et al. 1995; Boissinot et al. 2000; Lee et al. 2007) and compared their false positive rates to  
245 older L1 loci (Fig. 4). When the alignments of 153 reads were spiked in, we found that the false positive  
246 rate (FPR) of the youngest L1 subfamilies were comparable to each other, ranging from 34-38%.  
247 However, as the spiked in alignments increased to 302 and 3091 reads, the FPR increased for L1HS to  
248 50.68% but not the other subfamilies. This indicates that polymorphic L1HS expression primarily affects  
249 the alignments to L1HS loci, and not the loci of closely related subfamilies.

250 L1-mapping methods (Upton et al. 2015; Rodić et al. 2015; Iskow et al. 2010; Ewing et al. 2010) and  
251 TE insertion detection software for whole genome sequencing (Gardner et al. 2017; Lee et al. 2012;  
252 Keane et al. 2013; Stewart et al. 2011; Sudmant et al. 2015; Ewing et al. 2011) can identify locations of  
253 non-reference TE insertions. Validating these insertions by PCR and Sanger sequencing can provide not  
254 only unique sequence flanking the insertion but potentially also the TE sequence. Users can input a  
255 custom table to **SQUIRE Map** and **Clean** (Supplemental Table S5) to add non-reference TEs and their  
256 flanking sequence to the alignment index and RepeatMasker BED file. We evaluated how incorporating

257 the non-reference table containing information about the L1RP plasmid affected the FPR in HEK293T  
258 cell data. We found that the FPR for L1HS only increased from 36.67% with 153 reads spiked in to  
259 39.34% with 3091 reads spiked in. Thus, adding L1RP information improved **Count's** accuracy at higher  
260 L1RP *in silico* expression levels.

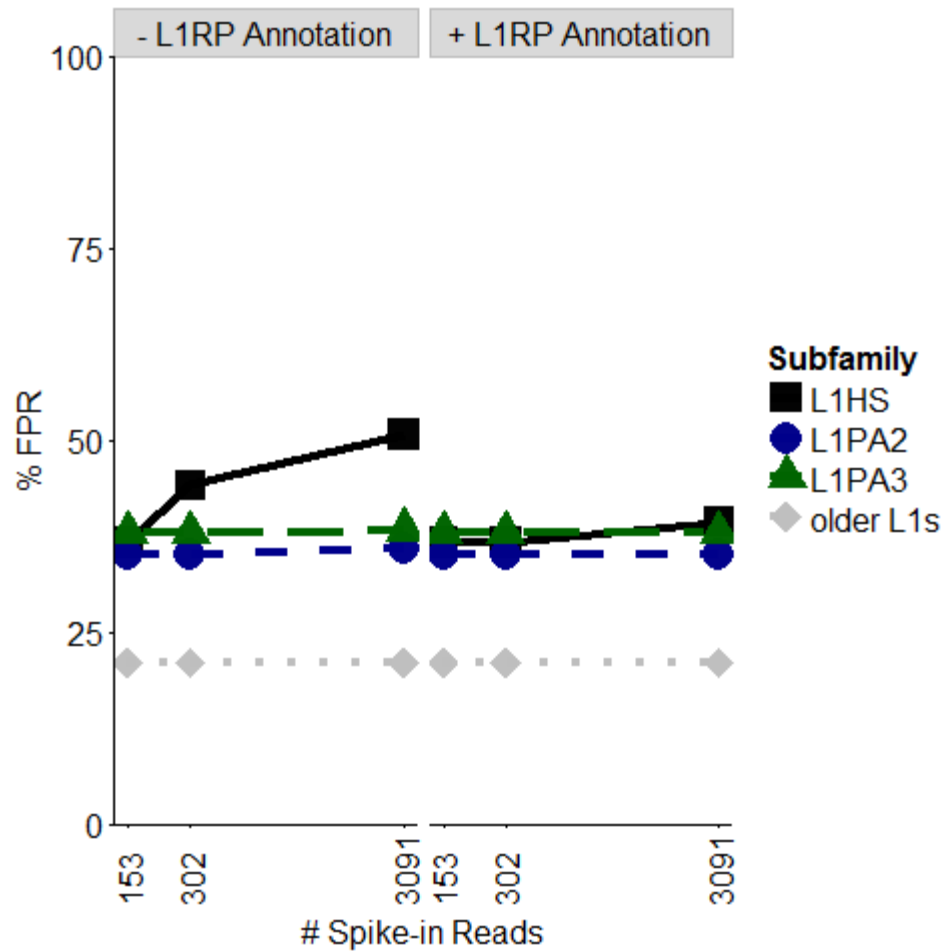

261

**Figure 4.** False positive rate (FPR) of L1 loci expression in HEK293T cells when spiking in L1RP-aligning reads. False positive expression is implicated a locus that previously had <10 reads has  $\geq 10$  reads after spike-in. % FPR is the percentage of loci with false positive loci relative to the total number of loci with  $\geq 10$  SQuIRE read counts. The number of spike-in reads (153, 302, 3091) represents 1X, 2X and 20X predicted endogenous polymorphic L1HS expression levels based on findings from Phillippe et al. 2016. The FPR is robust for older L1 subfamilies with increased spike-in reads. The addition of L1RP annotation in a non-reference table reduces the change in false positive rate for L1HS after increasing spike-in reads.



## 262 **Comparison to other software**

263 Currently published TE analysis software include RepEnrich, TEtranscripts, and TETools  
264 (Criscione et al. 2014; Jin et al. 2015; Lerat et al. 2016). We used the simulated hg38 TE data described  
265 above to compare the recovery of simulated reads to the correct subfamily among TE quantification  
266 software (% Observed/Expected). For mapping, we ran each software's recommended aligner: STAR  
267 (used by SQuIRE and TEtranscripts), Bowtie 2 (used by TETools), and Bowtie 1 (used by RepEnrich).  
268 We found that SQuIRE ( $99.86\% \pm 1.46\%$ ), TETools ( $100.14 \pm 2.21\%$ ), and TEtranscripts ( $95.89 \pm$   
269  $16.41\%$ ) had comparable % Observed/Expected rates (Supplemental Fig. S3). In contrast, RepEnrich  
270 ( $108.77 \pm 40.67\%$ ) was less accurate in terms of % Observed/Expected. This is likely attributable to  
271 RepEnrich's recommended use of Bowtie 1, which discards discordant reads and limits the number of  
272 attempts to align both paired-end mates to repetitive regions. To support this, we compared how often  
273 each aligner mapped a uniquely aligning simulated read to the correct location. We indeed found that  
274 Bowtie 1 failed to report unique reads more often in a paired-end library compared to single-end  
275 (Supplemental Table S6).

276 To compare SQuIRE to other TE analysis tools with biological data, we ran each pipeline on  
277 publically available adult C57Bl/6 mouse tissue RNA-seq data (Brawand et al. 2011) using  
278 GRCm38/mm10 (mm10) TE annotation. We compared the expression of subfamilies in testis compared  
279 to pooled data from brain, heart, kidney, and liver tissues. To independently evaluate the fold-changes of  
280 TE RNA between testis and somatic tissues, we also used our previously published adult C57Bl/6 mouse  
281 Nanostring results (Gnanakkan et al. 2013). Unlike RNA-seq analysis, which infers transcript levels by  
282 counting reads, Nanostring uses uniquely mapping probes to capture and count RNA molecules. We  
283 compared the Nanostring  $\log_2$  fold changes ( $\log_2FC$ ) of TE subfamily expression in testis and pooled  
284 somatic tissue to the  $\log_2FC$  values found by SQuIRE, RepEnrich, TEtranscripts, and TETools  
285 (Supplemental Fig. S4). We first looked at how often the direction of fold change corresponded between  
286 each tool and Nanostring. For the 16 subfamilies queried, SQuIRE and TETools shared the same direction

287 of fold change as Nanostring more often than the other tools (SQuIRE: 12, TETools: 12, TETranscripts: 9,  
288 RepEnrich: 8). Moreover, compared to TETools, SQuIRE reported log<sub>2</sub>FC values closer to the expected  
289 values from Nanostring (mean absolute differences in log<sub>2</sub>FC from Nanostring– SQuIRE: 0.965,  
290 TETools: 1.34, TETranscripts: 1.16, RepEnrich: 1.11).

291 With SQuIRE, we can closely examine the mouse RNA-seq data at the locus level. For the 16  
292 subfamilies analyzed by Nanostring and the TE analysis tools, we found that the reported subfamily-level  
293 expression could be attributed to fewer than 7% of each subfamily's loci (Supplemental Fig. S5). This  
294 suggests that regulation of TE transcription is not necessarily shared across all TEs from the same  
295 subfamily. On the other hand, whereas the other subfamilies studied by Nanostring have only 1-4  
296 significantly differentially expressed loci (log<sub>2</sub>FC >1, padj < 0.05), the IAPLTR3 subfamily has 11 loci  
297 that are all differentially expressed in testis compared to somatic tissues (Fig. 5A). To test whether this  
298 was an enrichment relative to the representation of IAPLTR3 in the mouse genome, we performed a  
299 Fisher's exact test and found that IAPLTR3 loci were 10-fold more likely than expected to be  
300 differentially expressed in testis (OR: 10.56, 95%CI: 5.25-18.97, padj < 1.61 e-08). This suggests that a  
301 subset of TE locus expression may still be impacted by subfamily-specific regulation.

302 To further investigate the interplay between genomic context and TE subfamily, we identified the  
303 closest genes to each differentially expressed locus and clustered the loci by their expression levels, as  
304 shown in Figure 5A. We found a cluster of 3 loci exhibiting broad expression across somatic tissues from  
305 the IAP1, MERVL, and MURVY LTR retrotransposon subfamilies. When we examined the genomic  
306 context of these 3 loci, we found that all were located within genes with known broad tissue expression  
307 (*Gpbp1*, *Csnk2a1*, *Kyat1*, respectively) (Yue et al. 2014), with examples shown in Supplemental Figure  
308 S6. Another locus from the MURVY subfamily is in a cluster of TEs exhibiting high testis-restricted  
309 expression. In examining the transcript overlapping the MURVY locus, we see that the transcript initiates  
310 outside of the locus and find that the transcript is an alternative splicing isoform with splice donors from  
311 the third and fourth exons of a gene ~5kb away (Fig. 5B). The gene, *Gm11981*, is a long noncoding RNA

312 (lncRNA) known to exhibit testis-restricted expression (Yue et al. 2014). The different MURVY-  
313 containing transcripts illustrate how the relationship between TE expression and neighboring transcription  
314 can vary across loci from the same subfamily. We also examined ERVB4-1B and IAPLTR3, the two LTR  
315 retrotransposon subfamilies that exhibited the highest fold change by Nanostring. These subfamilies were  
316 represented in the high-expressing, tissue-restricted loci cluster (Fig. 5A). While the transcription of the  
317 ERVB4-1B locus on chr13 did not extend beyond annotations for that subfamily (Fig. 5C), the IAPLTR3  
318 loci on chr14 (Fig. 5D) and chr18 are part of longer transcripts that initiate outside of the annotated TE.  
319 Unlike the MURVY locus on chr11, there is no evidence of splicing into the IAPLTR and ERVB4-1B  
320 loci. Thus, TEs from different subfamilies may be subject to different mechanisms of transcriptional  
321 regulation as evidenced by expression within different transcript structures. Altogether, this stresses the  
322 utility of using SQUIRE to analyze TE transcription at the locus level.

323

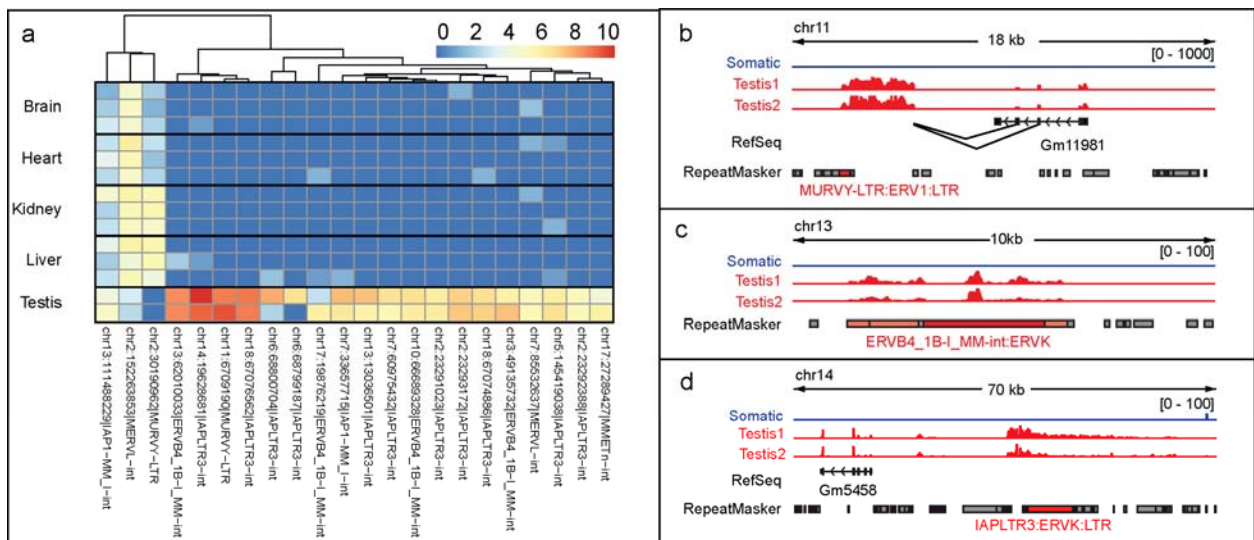

324  
325

**Figure 5.** Differentially expressed TE loci belonging to subfamilies previously analyzed by Nanostring a. The X-axis represents replicates of somatic and testis tissue samples from adult C57Bl/6 mouse. The Y-axis represents differentially expressed TE loci. The heatmap colors represent the log<sub>2</sub> of total read counts +1 for each TE locus. b-d. Examples of intergenic TE loci differentially expressed in testis compared to somatic tissues. Tracks from brain, heart, kidney and liver replicates were collapsed into a single track. The scales of count expression are shown in brackets. The RefSeq track represents annotated genes. The RepeatMasker track represents transposable elements annotated in the reference genome. Transposable elements colored in red belong to the subfamily indicated; dark red indicates that that RepeatMasker entry meets significant differential expression thresholds (log<sub>2</sub>FC > 2, padj < 0.05).

## 326 **Benchmarking for SQuIRE's Memory Usage and Running Time**

327 To benchmark SQuIRE's memory usage and running time for RNA-seq data of different  
328 sequencing depths, we subset the high-depth (mean 263 million reads across 8 lanes) HEK293T cell line  
329 RNA-seq data into 1, 2, and 3-lane libraries with a mean sequencing depth of 32, 65, and 98 million  
330 reads. We evaluated the speed and memory performance of each *Quantification* and *Analysis* stage tool  
331 for each sequencing depth (Fig. 6) using 8 parallel threads and 64 Gb of available memory. We found that  
332 sequencing depth had the greatest effect on **Count**, taking 8.6 hours to complete the 3-lane library  
333 compared to 2.4 hours for the 1 lane library. The other tools took much less time and were less affected  
334 by sequencing depth. **Map** took 1-2 hours for the different libraries. **Call** running time was also  
335 independent of library size, but it was greater when including all TE counts (10 minutes) compared to  
336 subfamily counts (2 minutes). We found that the memory usage of each tool was largely independent of  
337 sequencing depth, taking between 39-40Gb of Memory for **Map**, 30-32Gb for **Count**, and 7-8Gb for  
338 **Call**.

## 339 **Implementation**

340 Our efforts at making SQuIRE easy to use has resulted in a simple installation process in which the  
341 user can copy and paste lines of code to install all prerequisite software and set up SQuIRE (Table 1). In  
342 addition, SQuIRE is the only program that downloads reference annotation for assembled genomes  
343 available on UCSC, allowing it to be easily adaptable to a variety of species. For genomes from non-  
344 model organisms or organism strains with high divergence from the reference annotation, SQuIRE can  
345 also use RepeatMasker software output for even wider compatibility. To ensure that the pipeline is  
346 streamlined and that the outputs are reproducible, SQuIRE also implements alignment and differential  
347 expression for the user. In making SQuIRE as user-friendly as possible, we intend to improve the  
348 reproducibility of bioinformatics in the TE field.

349

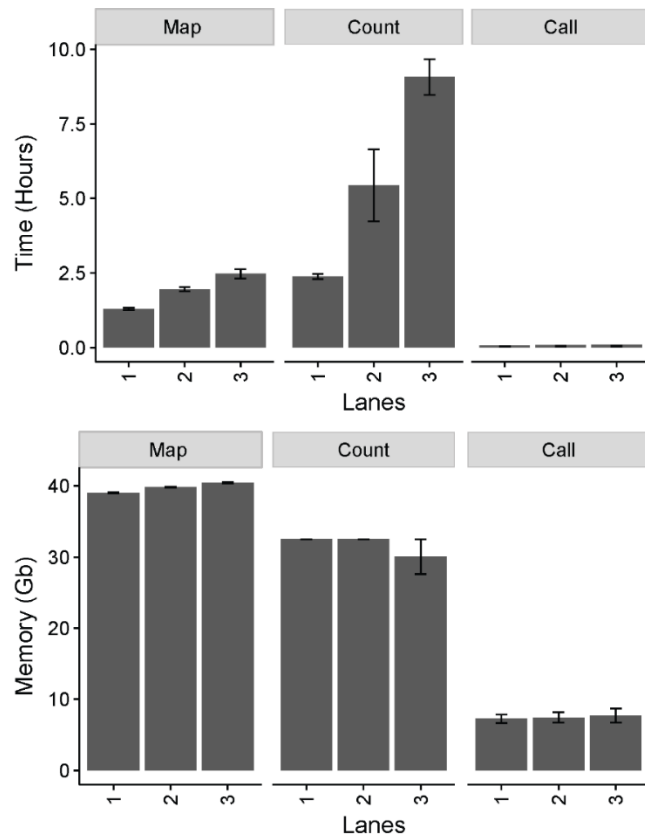

**Figure 6.** Usage data for the main modules of SQuIRE. Time (Hours) and Memory for SQuIRE **Count**, **Map** and **Call**. Mean library sizes for RNA seq data were 1 lane= 32,912,528 reads, 2 lanes= 65,573,850 reads, 3 lanes= 98,757,439 reads.

|                                                        | SQuIRE                 | RepEnrich                             | Tetranscripts   | TETools                                |
|--------------------------------------------------------|------------------------|---------------------------------------|-----------------|----------------------------------------|
| Provides Locus-level TE RNA quantification             | <b>YES</b>             | --                                    | --              | --                                     |
| Provides TE transcript information                     | <b>YES</b>             | --                                    | --              | --                                     |
| Copy-and-paste installation                            | <b>YES</b>             | --                                    | --              | --                                     |
| Provides prerequisite annotation files for any species | <b>YES</b>             | --                                    | --              | --                                     |
| Can incorporate non-reference TEs                      | <b>YES</b>             | --                                    | --              | <b>YES</b>                             |
| Performs alignment                                     | <b>YES</b> – uses STAR | Recommends Bowtie 1                   | Recommends STAR | <b>YES</b> – uses Bowtie 1 or Bowtie 2 |
| Uses genome for alignment                              | <b>YES</b>             | <b>YES</b> - Genome + TE pseudogenome | <b>YES</b>      | --                                     |
| Provides gene expression quantification                | <b>YES</b>             | --                                    | <b>YES</b>      | --                                     |
| Performs differential expression                       | <b>YES</b>             | --                                    | <b>YES</b>      | <b>YES</b>                             |

350

**Table 1. Feature comparison of RNA-seq Analysis tools for TEs.**

351 **Discussion**

352 We have developed Software for Quantifying Interspersed Repeat Expression (SQuIRE) to  
353 characterize TE expression using RNA-seq data. TEs are highly repeated in the genome, which can pose  
354 challenges for mapping reads unambiguously to specific transcribed loci. SQuIRE is the first RNA-seq  
355 analysis software that provides locus-specific TE expression quantification while also outputting  
356 subfamily-level expression estimates (Table 1). Our approach uses unambiguously mapping reads and an  
357 Expectation-Maximization algorithm to estimate levels of TE transcripts. SQuIRE additionally provides  
358 information on the structure of each TE transcript, which can be shorter or longer, sense or antisense  
359 compared to the annotated repeat. We have shown that SQuIRE can correctly attribute a high percentage  
360 of reads originating from TEs using simulated data. Although this percentage is lower for frequently  
361 retrotranspositionally active, less divergent TEs (e.g., *AluYa5*, *AluYa8*, *AluYb8*, *AluYb9*, *L1HS*), we  
362 found that implementation of an Expectation-Maximization (EM) algorithm (Jin et al. 2015; Li and  
363 Dewey 2011) improves accuracy and lowers both false positive and false negative estimations of whether  
364 a TE is expressed. This finding also holds in biological settings, where SQuIRE is able to correctly  
365 identify instances of full-length L1 expression in total RNA RNA-seq data from cell lines wherein  
366 previous studies had identified these loci using a combination of 5'RACE and 3' primer extension  
367 methods (Deininger et al. 2017). This confirms that SQuIRE can detect the expression of TEs in the  
368 reference genome that have in the past been problematic for global TE RNA expression analysis.

369 The ongoing activity of TEs also results in a significant number of mobile element insertion variants  
370 (MEI) (Beck et al. 2010; Sudmant et al. 2015; Stewart et al. 2011). Numerous commonly occurring  
371 structural variants owed to retrotransposition are missing in reference genome assemblies. SQuIRE  
372 provides users with two options to query transcription of these repeats. First, it can detect their  
373 transcription at the subfamily level. We have shown that SQuIRE can detect expression of L1HS elements  
374 when we express an ectopic sequence. It maintains a low false positive rate of misattributing these reads  
375 to endogenous L1HS loci. Thus, SQuIRE can be useful for detecting altered regulation of young TE



376 subfamilies even when specific loci that are expressed are unknown. Secondly, SQuIRE can use  
377 sequences of known, non-reference TE insertion polymorphisms to detect locus-specific expression when  
378 these are available. For example, in the human genome, L1HS element sites and sequences can be  
379 obtained by targeted TE insertion mapping (Upton et al. 2015; Rodić et al. 2015; Iskow et al. 2010;  
380 Ewing et al. 2010) or whole genome sequencing (Gardner et al. 2017; Lee et al. 2012; Keane et al. 2013;  
381 Ewing et al. 2011). Polymorphic TE insertions have been reported to databases such as euL1db (Mir et al.  
382 2015), dbRIP (Wang et al. 2006) and 1000 Genomes Project (Sudmant et al. 2015). If the polymorphic  
383 insertions have been verified and sequenced in the user's samples, SQuIRE is capable of incorporating  
384 user-provided, non-reference TE sequence to estimate TE expression at these loci. This may be a useful  
385 feature for understanding functional consequences of these insertion variants (Payer et al. 2017).

386 The SQuIRE algorithm builds on strategies used by previous TE analysis software (Criscione et al.  
387 2014; Jin et al. 2015; Lerat et al. 2016). Here, we show that SQuIRE provides additional features and  
388 improves on the accuracy of these methods, as assessed using both simulated reads and orthogonal  
389 approaches to measure  $\log_2$  fold changes in mouse tissue comparisons. Our findings suggest that  
390 important biologic insights can be gained by examining TE transcription at the locus level.

391 To date, locus-specific studies of TE expression and activity have mostly focused on identifying  
392 transcriptionally and retrotranspositionally active L1s in the human genome (Deininger et al. 2017;  
393 Philippe et al. 2016; Scott et al. 2016; Brouha et al. 2003; Beck et al. 2010; Tubio et al. 2014; Pitkänen et  
394 al. 2014). In applying SQuIRE to study locus-specific TE expression genome-wide in mouse tissues, we  
395 can see that this paradigm is not unique to L1s or humans. It seems a very limited subset of TE loci are  
396 transcribed with complex patterns of tissue-specific expression. Furthermore, we found that the tissue  
397 expression patterns of TE loci were driven by a variety of transcriptome contexts: broadly expressed  
398 mRNA transcripts, testis-specific lncRNA and authentic TE 'unit' transcripts. How these TEs affect  
399 genome regulation remains an open question. Prior to SQuIRE, the inability to map TE expression limited  
400 genome-wide analysis of TEs to the effects of *cis*-acting elements on transcriptional (Faulkner et al.

401 2009; Kalitsis and Saffery 2009; Le et al. 2015; Xie et al. 2013) and post-transcriptional (Stower 2013;  
402 Sorek et al. 2002; Ecco et al. 2016; Athanasiadis et al. 2004) regulation. Further, the effects of  
403 neighboring genes on TE transcription are not well-understood. In providing locus-level TE transcript  
404 estimations, SQuIRE can enable studies that dissect the regulatory impacts of TE and gene expression.

## 405 **Methods**

### 406 **Implementation of STAR aligner in Map**

407 **Map** uses parameters tailored to the alignment of TEs. By default STAR only reports reads that map  
408 concordantly and to 10 or fewer locations. **Map** retains more reads mapped to TEs by reporting reads that  
409 map to 100 or fewer locations (`--outFilterMultimapNmax 100 --winAnchorMultimapNmax 100`). For  
410 paired-end reads, **Map** also reports paired reads that map discordantly (`--chimSegmentMin`  
411 `<read_length>`) and single reads with unmapped mates (`--outFilterScoreMinOverLread 0.4 --`  
412 `outFilterMatchNminOverLread 0.4`). **Map** can incorporate the non-reference TE sequences and generate a  
413 FASTA file that STAR adds to the genome index with the option “`--genomeFastaFiles <fasta>`”. To  
414 provide splicing information to the tools in the *Analysis Stage*, **Map** also uses the UCSC RefSeq gene  
415 annotation and assesses reads overlapping splice junctions with the options “`--sjdbGTFfile <gtf> --`  
416 `sjdbOverhang <read_length -1> --twopassMode Basic`”. **Map** produces a sorted BAM file that includes  
417 intron and splicing information for downstream transcriptome assembly analysis.

### 418 **Implementation of StringTie in Count**

419 **Count** runs StringTie (Pertea et al. 2015) using these default settings guided by RefSeq gtf obtained  
420 from UCSC with **Fetch**. **Count** uses the “-e” StringTie option to quantify expression only to annotated  
421 transcripts without assembly of novel transcripts. We convert the fpkm values to counts by multiplying  
422 the per-exon coverage by exon length normalized by read length.

### 423 **DESeq2 Implementation in Call**

424 **Call** incorporates the Bioconductor package DESeq2 (Love et al. 2014; Huber et al. 2015) with its  
425 suggested parameters. Users input the sample names and experimental design (ie which samples are  
426 treatment or control), which **Call** uses to find **Count** data and create a count matrix for annotated RefSeq  
427 genes, StringTie transcripts and TEs. **Call** outputs differential expression tables and generates MA-plots,  
428 data quality assessment plots, and volcano plots.

## 429 **STAR implementation in Draw**

430 To visualize the distribution of reads across the TE, **Draw** runs **STAR** (Dobin et al. 2013) with the  
431 parameters “-runMode input AlignmentsFromBAM -outWigType bedGraph” to provide visualization of  
432 read alignments. It will output bedgraphs of all reads (“multi”) and only uniquely (“unique”) aligning  
433 reads. **Draw** also compresses the bedgraphs into bigwig format for IGV (Robinson et al. 2011) and UCSC  
434 Genome Browser (Rosenbloom et al. 2014) viewing. If the RNA-seq data is stranded it will output unique  
435 and multi bedgraphs for each strand.

## 436 **RNA-seq simulation**

437 We randomly selected 100,000 TEs from the hg38 Repeatmasker annotation downloaded by **Fetch**.  
438 We limited our list of potential TEs to those included in TEtranscripts (Jin et al. 2015) and RepEnrich  
439 (Criscione et al. 2014) to enable comparisons between these different programs. Using the selected TE  
440 coordinates we generated a BED file using **Clean** and obtained Fasta sequences using **Seek**. From these  
441 TE sequences, we used the Polyester package from Bioconductor (R version 3.4.1, Huber et al. 2015)  
442 (Huber et al. 2015) to simulate 100bp, paired-end, stranded RNA-seq reads with normally distributed  
443 fragment lengths around a mean of 250bp. We simulated a uniformly distributed sequencing error rate of  
444 0.5%. TEs were simulated with a mean read coverage of 20X, with 250 TEs deviating from that mean  
445 between 2-100 fold.

## 446 **HEK293T Cell Culture, Transfection and Sequencing**

447 Tet-On HEK293TLD (293T) cells (Taylor et al. 2013) were grown at 37C, 5% CO<sub>2</sub> in DMEM with  
448 10% Tet-Free FBS (Takara, Mountain View, CA) and passaged every 3-5 days as needed.

449 LINE expression constructs were cloned into the pCEP4 backbone (Thermo Fisher Scientific,  
450 Waltham, MA) modified to confer puromycin resistance. Plasmids encoded either LIRP (MT302) or had  
451 no insert (Taylor et al. 2013). For transfection, 300,000 293T cells were plated in 2 mL volume. 24 hours  
452 later, cells were transfected using a cocktail of 2 ug plasmid DNA and 6 uL Fugene HD (Promega), and

453 puromycin was added 24 hours later for a total of 3 days of selection. 500,000 cells were then plated in 3  
454 wells each, and doxycycline was added 2 hours later (final concentration of 1 ug/ml) to induce L1  
455 expression. RNA was collected after 72 hours of L1 expression using the Zymo Quick-RNA MiniPrep kit  
456 (Zymo Research, Tustin, CA). The RNA libraries of transfected 293T cells were prepared using the  
457 Illumina TruSeq Stranded Total Library Prep Kit with Ribo-Zero Gold (San Diego, CA) to provide  
458 stranded, ribosomal RNA depleted RNA. The libraries were sequenced on an Illumina HiSeq 2500, using  
459 6 samples per lane across 8 lanes with paired-end 100bp reads. We generated a mean of 263,127,067  
460 paired reads per sample. The raw sequencing data were deposited to the NCBI Genome Expression  
461 Omnibus (GEO) with accession number GSE113960.

#### 462 **HEK293T Cell RNA-seq Analysis and *In Silico* Spike-in Experiment**

463 For detection of fixed L1 expression identified by Deininger et al. by 5'RACE and poly-A selected  
464 RNA sequencing in HEK293 cells, we ran SQuIRE **Map**, **Count**, and **Call** on HEK293T cell samples  
465 transfected with empty L1RP vector (DA5 and DA6). To determine the effect of L1RP transfection on the  
466 false positive rate of L1 RNA estimation, we ran **Map** and **Count** on HEK293T cells transfected with  
467 L1RP and vector. To simulate the effect of polymorphic TE expression on typical RNA-seq samples, we  
468 downsampled a transfected (DA1) and control (DA5) sample to a single lane per sample (average 32  
469 million reads). To identify L1RP aligning reads in the L1RP-transfected cell, we used SAMtools (Li et al.  
470 2009) to identify reads that align to the chromosome construct provided by the non-reference table  
471 (Supplemental Table S5). To downsample the L1RP-aligning reads, we used the SAMtools “-s  
472  $\langle INT.FRAC \rangle$ ” option with 0.01, 1.001, and 3.0004 as inputs. The integer before the decimal indicates  
473 the seed value and the number after the decimal indicates the fraction of total alignments desired for  
474 subsampling. We then identified all alignments to the genome sharing the same Read IDs as the down-  
475 sampled L1RP-aligning reads. We used SAMtools merge to combine the alignments of L1RP-aligning  
476 reads with the BAM file of the HEK293T cell sample transfected with empty vector (DA5).

#### 477 **TE RNA-seq tool Comparison**

478 Adult C57BL/6 mouse RNA-seq data were obtained from GEO with accession number GSE30352.

479 All pipelines were run on a server with a maximum of 128 GB memory available and 8 threads (-p  
480 setting).

481 RepEnrich (Criscione et al. 2014)– We obtained the hg38 annotation for RepeatMasker from the  
482 RepEnrich GitHub website. For the mm10 annotation, we obtained the mm10.fa.out.gz RepeatMasker  
483 (Smit, AFA, Hubley, R & Green) annotation from the RepeatMasker website. We ran the setup for  
484 RepEnrich following instructions from the website for each genome build. We then mapped the data to  
485 the genome using Bowtie 1 (Langmead et al. 2009) according to RepEnrich’s instructions to generate  
486 separate uniquely mapping sam and multi-mapping read .fastq files. These were then used for the  
487 RepEnrich software with the “-pairedend TRUE” parameter for simulated human data, and “-pairedend  
488 FALSE” for mouse data.

489 TETools (Lerat et al. 2016)– We generated rosette files for hg38 and mm10 for TETools by taking  
490 the Repeatmasker annotation from **Clean** for the first column and the repeat taxonomy for the second  
491 column (subfamily:family:superfamily). We used the BED file from **Clean** with **Seek** to obtain TE  
492 FASTA sequences for generation of a pseudogenome for TETools. TETools was run with the “-bowtie2”,  
493 “-RNApair” and “-insert 250” parameters for simulated human data and “-bowtie2”, “-insert 76” for  
494 mouse data.

495 Tetranscripts (Jin et al. 2015) –We obtained hg38 and mm10 GTF annotation from the Tetranscripts  
496 website. We aligned the data to the genome with STAR using “--winAnchorMultimapNmax 100”, “--  
497 outFilterMultimapNmax 100” parameters for multi-mapping. We then ran Tetranscripts with the “--mode  
498 multi” setting to utilize its expectation-maximization algorithm for assigning multi-reads for the resulting  
499 SAM file. Since Tetranscripts analyzes TE and gene expression together, we used refGene annotation  
500 obtained by SQuIRE **Fetch** for the required gtf file. We used the parameters “--format SAM”, “--mode  
501 multi”, “--stranded yes” for simulated human data, and “--format SAM”, “--mode multi”, “--stranded no”  
502 for mouse data.

## 503 **Aligner Comparison**

504 We ran the aligners Bowtie1 (Langmead et al. 2009), Bowtie2 (Langmead and Salzberg 2012), and  
505 STAR (Dobin et al. 2013) on the simulated TE RNA-seq data described above. We set each aligner to  
506 output a maximum of 2 valid alignments to quickly identify uniquely aligning reads with the parameter “-  
507 m2” for Bowtie 1, “-k2” for Bowtie 2, and “--outSAMmultNmax 2” for STAR. We also ran STAR with  
508 the parameters “--outFilterScoreMinOverLread 0.4 --outFilterMatchNminOverLread 0.4 --  
509 chimSegmentMin 100” to allow for discordant alignments, which STAR excludes by default. Bowtie2  
510 reports discordant alignments by default, while Bowtie 1 can only report paired alignments. We used  
511 BEDTools (Quinlan and Hall 2010) to intersect the BAM outputs to RepeatMasker annotation to identify  
512 the TEs to which the aligners mapped the reads. Reads that only appeared once as “uniquely aligning”.  
513 We assessed whether the mapped TE matched the templating TE for the simulated read to determine if  
514 the uniquely aligning reads mapped to the correct location.

## 515 **Data Access**

516 The raw sequencing data and SQuIRE Count output for HEK293T cell transfection were deposited to  
517 the NCBI Genome Expression Omnibus with accession number GSE113960. SQuIRE was written in  
518 Python2 and is available at the website <https://github.com/wyang17/SQuIRE> and PyPI. It was developed  
519 for UNIX environments. We provide step-by-step instructions on our README to install the correct  
520 versions of all software. These instructions include using the package manager Conda (conda.io) to  
521 download the correct versions of prerequisite software for SQuIRE (e.g., Python, R (R Development Core  
522 Team 2011), STAR, BEDTools, StringTie, SAMtools (Li et al. 2009), UCSC tools and Bioconductor  
523 packages. The README also instructs users how to create a non-reference table with the exogenous or  
524 polymorphic TE sequences and coordinates that they would like to add to the reference genome. Bash  
525 scripts to run each tool in the SQuIRE pipeline are also included. Users can fill in crucial experiment  
526 information (raw data, read length, paired, strandedness, genome build, sample name and experimental

527 design) into the “arguments.sh” file, which the other scripts reference to run each step with the correct  
528 parameters.

## 529 **Acknowledgements**

530 We would like to thank Veena Gnanakkan for preparation of C57BL/6 mouse tissue RNA and  
531 analysis of Nanostring data. We would like to thank Jane Welch, Paul Schaugency, Shubha Tirumale  
532 and Ping Ye for testing SQuIRE. We would like to thank Sibyl Medabalimi for assistance in developing  
533 the name of SQuIRE. We would also like to acknowledge the assistance of the NYU Genome Technology  
534 Center and Jared Steranka in preparing the RNA for RNA sequencing. This research was supported by  
535 National Institutes of Health (NIH) grants R01GM124531 and P50GM107632, and Department of  
536 Defense Congressionally Directed Medical Research Program (CDMRP) grant OC120390 (to K.H.B.).  
537 W.R.Y. received a Teal Predoctoral Scholar award in association with OC120390.

538 *Author Contributions:* W.R.Y. contributed to study design, programming of SQuIRE pipeline,  
539 statistical analysis, and primary authorship and manuscript; D.A. contributed culture and transfection of  
540 HEK293T cells, and suggestions for analysis and manuscript; C.N.P. contributed to debugging SQuIRE  
541 and development of README for SQuIRE website; L.M.P. & K.H.B. jointly contributed to overall study  
542 design, data interpretation and manuscript.

543

544

545



546 **References**

- 547 Abecasis GR, Auton A, Brooks LD, DePristo M a, Durbin RM, Handsaker RE, Kang HM, Marth GT,  
548 McVean G a. 2012. An integrated map of genetic variation from 1,092 human genomes. *Nature* **491**:  
549 56–65.  
550 [http://www.pubmedcentral.nih.gov/articlerender.fcgi?artid=3498066&tool=pmcentrez&rendertype=](http://www.pubmedcentral.nih.gov/articlerender.fcgi?artid=3498066&tool=pmcentrez&rendertype=abstract)  
551 [abstract](http://www.pubmedcentral.nih.gov/articlerender.fcgi?artid=3498066&tool=pmcentrez&rendertype=abstract) (Accessed May 21, 2013).
- 552 Athanasiadis A, Rich A, Maas S. 2004. Widespread A-to-I RNA editing of Alu-containing mRNAs in the  
553 human transcriptome. *PLoS Biol* **2**: e391. <http://www.ncbi.nlm.nih.gov/pubmed/15534692>  
554 (Accessed May 1, 2018).
- 555 Beck CR, Collier P, Macfarlane C, Malig M, Kidd JM, Eichler EE, Badge RM, Moran J V. 2010. LINE-1  
556 retrotransposition activity in human genomes. *Cell* **141**: 1159–70.  
557 <http://www.ncbi.nlm.nih.gov/pubmed/20602998> (Accessed April 29, 2018).
- 558 Beck CR, Garcia-Perez JL, Badge RM, Moran J V. 2011. LINE-1 elements in structural variation and  
559 disease. *Annu Rev Genomics Hum Genet* **12**: 187–215.  
560 <http://www.ncbi.nlm.nih.gov/pubmed/21801021> (Accessed April 19, 2018).
- 561 Boissinot S, Chevret P, Furano A V. 2000. L1 (LINE-1) Retrotransposon Evolution and Amplification in  
562 Recent Human History. *Mol Biol Evol* **17**: 915–928.  
563 <http://academic.oup.com/mbe/article/17/6/915/1037809> (Accessed April 30, 2018).
- 564 Brawand D, Soumillon M, Necsulea A, Julien P, Csárdi G, Harrigan P, Weier M, Liechti A, Aximu-Petri  
565 A, Kircher M, et al. 2011. The evolution of gene expression levels in mammalian organs. *Nature*  
566 **478**: 343–348. <http://www.nature.com/articles/nature10532> (Accessed April 21, 2018).
- 567 Brouha B, Schustak J, Badge RM, Lutz-Prigge S, Farley AH, Moran J V, Kazazian HH. 2003. Hot L1s  
568 account for the bulk of retrotransposition in the human population. *Proc Natl Acad Sci U S A* **100**:

- 569 5280–5. <http://www.ncbi.nlm.nih.gov/pubmed/12682288> (Accessed April 30, 2018).
- 570 Burns KH, Boeke JD. 2012. Human Transposon Tectonics. *Cell* **149**: 740–752.
- 571 <http://linkinghub.elsevier.com/retrieve/pii/S009286741200517X> (Accessed August 9, 2017).
- 572 Chuong EB, Rumi MAK, Soares MJ, Baker JC. 2013. Endogenous retroviruses function as species-  
573 specific enhancer elements in the placenta. *Nat Genet* **45**: 325–9.
- 574 <http://www.ncbi.nlm.nih.gov/pubmed/23396136> (Accessed April 21, 2018).
- 575 Criscione SW, Zhang Y, Thompson W, Sedivy JM, Neretti N. 2014. Transcriptional landscape of  
576 repetitive elements in normal and cancer human cells. *BMC Genomics* **15**: 583.
- 577 [http://www.pubmedcentral.nih.gov/articlerender.fcgi?artid=4122776&tool=pmcentrez&rendertype=](http://www.pubmedcentral.nih.gov/articlerender.fcgi?artid=4122776&tool=pmcentrez&rendertype=abstract)  
578 [abstract](http://www.pubmedcentral.nih.gov/articlerender.fcgi?artid=4122776&tool=pmcentrez&rendertype=abstract) (Accessed April 7, 2016).
- 579 Deininger P. 2011. Alu elements: know the SINEs. *Genome Biol* **12**: 236.
- 580 <http://genomebiology.biomedcentral.com/articles/10.1186/gb-2011-12-12-236> (Accessed April 19,  
581 2018).
- 582 Deininger P, Morales ME, White TB, Baddoo M, Hedges DJ, Servant G, Srivastav S, Smither ME,  
583 Concha M, DeHaro DL, et al. 2017. A comprehensive approach to expression of L1 loci. *Nucleic*  
584 *Acids Res* **45**: e31. <http://www.ncbi.nlm.nih.gov/pubmed/27899577> (Accessed March 29, 2018).
- 585 Dobin A, Davis CA, Schlesinger F, Drenkow J, Zaleski C, Jha S, Batut P, Chaisson M, Gingeras TR.  
586 2013. STAR: ultrafast universal RNA-seq aligner. *Bioinformatics* **29**: 15–21.
- 587 <https://academic.oup.com/bioinformatics/article-lookup/doi/10.1093/bioinformatics/bts635>  
588 (Accessed April 20, 2018).
- 589 Ecco G, Cassano M, Kauzlaric A, Duc J, Coluccio A, Offner S, Imbeault M, Rowe HM, Turelli P, Trono  
590 D. 2016. Transposable Elements and Their KRAB-ZFP Controllers Regulate Gene Expression in  
591 Adult Tissues. *Dev Cell* **36**: 611–23. <http://www.ncbi.nlm.nih.gov/pubmed/27003935> (Accessed

- 592 May 1, 2018).
- 593 Ewing AD, Kazazian HH, Jr. 2010. High-throughput sequencing reveals extensive variation in human-  
594 specific L1 content in individual human genomes. *Genome Res* **20**: 1262–70.  
595 <http://www.ncbi.nlm.nih.gov/pubmed/20488934> (Accessed April 29, 2018).
- 596 Ewing AD, Kazazian HH, Jr. 2011. Whole-genome resequencing allows detection of many rare LINE-1  
597 insertion alleles in humans. *Genome Res* **21**: 985–90.  
598 <http://www.ncbi.nlm.nih.gov/pubmed/20980553> (Accessed April 29, 2018).
- 599 Faulkner GJ, Kimura Y, Daub CO, Wani S, Plessy C, Irvine KM, Schroder K, Cloonan N, Steptoe AL,  
600 Lassmann T, et al. 2009. The regulated retrotransposon transcriptome of mammalian cells. *Nat*  
601 *Genet* **41**: 563–71. <http://dx.doi.org/10.1038/ng.368> (Accessed October 2, 2015).
- 602 Gardner EJ, Lam VK, Harris DN, Chuang NT, Scott EC, Pittard WS, Mills RE, 1000 Genomes Project  
603 Consortium 1000 Genomes Project, Devine SE. 2017. The Mobile Element Locator Tool (MELT):  
604 population-scale mobile element discovery and biology. *Genome Res* **27**: 1916–1929.  
605 <http://www.ncbi.nlm.nih.gov/pubmed/28855259> (Accessed April 27, 2018).
- 606 Giordano J, Ge Y, Gelfand Y, Abrusán G, Benson G, Warburton PE. 2007. Evolutionary history of  
607 mammalian transposons determined by genome-wide defragmentation. *PLoS Comput Biol* **3**: e137.  
608 <http://journals.plos.org/ploscompbiol/article?id=10.1371/journal.pcbi.0030137> (Accessed May 2,  
609 2016).
- 610 Gnanakkan VP, Jaffe AE, Dai L, Fu J, Wheelan SJ, Levitsky HI, Boeke JD, Burns KH. 2013. TE-array--a  
611 high throughput tool to study transposon transcription. *BMC Genomics* **14**: 869.  
612 <http://www.ncbi.nlm.nih.gov/pubmed/24325565> (Accessed April 17, 2018).
- 613 Hancks DC, Kazazian HH, Jr. 2010. SVA retrotransposons: Evolution and genetic instability. *Semin*  
614 *Cancer Biol* **20**: 234–45. <http://www.ncbi.nlm.nih.gov/pubmed/20416380> (Accessed April 19,

- 615 2018).
- 616 Huang CRL, Burns KH, Boeke JD. 2012. Active Transposition in Genomes. *Annu Rev Genet* **46**: 651–  
617 675. <http://www.annualreviews.org/doi/10.1146/annurev-genet-110711-155616> (Accessed August  
618 9, 2017).
- 619 Huber W, Carey VJ, Gentleman R, Anders S, Carlson M, Carvalho BS, Bravo HC, Davis S, Gatto L,  
620 Girke T, et al. 2015. Orchestrating high-throughput genomic analysis with Bioconductor. *Nat*  
621 *Methods* **12**: 115–21. <http://dx.doi.org/10.1038/nmeth.3252> (Accessed February 23, 2016).
- 622 Iskow RC, McCabe MT, Mills RE, Torene S, Pittard WS, Neuwald AF, Van Meir EG, Vertino PM,  
623 Devine SE. 2010. Natural mutagenesis of human genomes by endogenous retrotransposons. *Cell*  
624 **141**: 1253–61. <http://www.ncbi.nlm.nih.gov/pubmed/20603005> (Accessed April 29, 2018).
- 625 Jin Y, Tam OH, Paniagua E, Hammell M. 2015. Tetranscripts: a package for including transposable  
626 elements in differential expression analysis of RNA-seq datasets. *Bioinformatics* **31**: 3593–9.  
627 <http://bioinformatics.oxfordjournals.org/content/early/2015/07/22/bioinformatics.btv422.abstract>  
628 (Accessed March 29, 2016).
- 629 Kalitsis P, Saffery R. 2009. Inherent promoter bidirectionality facilitates maintenance of sequence  
630 integrity and transcription of parasitic DNA in mammalian genomes. *BMC Genomics* **10**: 498.  
631 [http://www.pubmedcentral.nih.gov/articlerender.fcgi?artid=2777200&tool=pmcentrez&rendertype=  
632 abstract](http://www.pubmedcentral.nih.gov/articlerender.fcgi?artid=2777200&tool=pmcentrez&rendertype=abstract) (Accessed May 21, 2013).
- 633 Kazazian HH. 2004. Mobile elements: drivers of genome evolution. *Science* **303**: 1626–32.  
634 <http://science.sciencemag.org/content/303/5664/1626.abstract> (Accessed December 22, 2015).
- 635 Keane TM, Wong K, Adams DJ. 2013. RetroSeq: transposable element discovery from next-generation  
636 sequencing data. *Bioinformatics* **29**: 389–90. <http://www.ncbi.nlm.nih.gov/pubmed/23233656>  
637 (Accessed April 27, 2018).

- 638 Kent WJ, Sugnet CW, Furey TS, Roskin KM, Pringle TH, Zahler AM, Haussler D. 2002. The human  
639 genome browser at UCSC. *Genome Res* **12**: 996–1006.  
640 <http://genome.cshlp.org/content/12/6/996.abstract> (Accessed March 25, 2016).
- 641 Kimberland ML, Divoky V, Prchal J, Schwahn U, Berger W, Kazazian HH. 1999. Full-Length Human L1  
642 Insertions Retain the Capacity for High Frequency Retrotransposition in Cultured Cells. *Hum Mol*  
643 *Genet* **8**: 1557–1560. <https://academic.oup.com/hmg/article-lookup/doi/10.1093/hmg/8.8.1557>  
644 (Accessed April 29, 2018).
- 645 Lander ES, Linton LM, Birren B, Nusbaum C, Zody MC, Baldwin J, Devon K, Dewar K, Doyle M,  
646 FitzHugh W, et al. 2001. Initial sequencing and analysis of the human genome. *Nature* **409**: 860–  
647 921. <http://dx.doi.org/10.1038/35057062> (Accessed July 10, 2014).
- 648 Langmead B, Salzberg SL. 2012. Fast gapped-read alignment with Bowtie 2. *Nat Methods* **9**: 357–9.  
649 [http://www.pubmedcentral.nih.gov/articlerender.fcgi?artid=3322381&tool=pmcentrez&rendertype=  
650 abstract](http://www.pubmedcentral.nih.gov/articlerender.fcgi?artid=3322381&tool=pmcentrez&rendertype=abstract) (Accessed July 10, 2014).
- 651 Langmead B, Trapnell C, Pop M, Salzberg SL. 2009. Ultrafast and memory-efficient alignment of short  
652 DNA sequences to the human genome. *Genome Biol* **10**: R25.  
653 [http://www.pubmedcentral.nih.gov/articlerender.fcgi?artid=2690996&tool=pmcentrez&rendertype=  
654 abstract](http://www.pubmedcentral.nih.gov/articlerender.fcgi?artid=2690996&tool=pmcentrez&rendertype=abstract) (Accessed July 9, 2014).
- 655 Le TN, Miyazaki Y, Takuno S, Saze H. 2015. Epigenetic regulation of intragenic transposable elements  
656 impacts gene transcription in *Arabidopsis thaliana*. *Nucleic Acids Res* **43**: 3911–21.  
657 <http://nar.oxfordjournals.org/content/early/2015/03/26/nar.gkv258.full> (Accessed March 4, 2016).
- 658 Lee E, Iskow R, Yang L, Gokcumen O, Haseley P, Luquette LJ, Lohr JG, Harris CC, Ding L, Wilson RK,  
659 et al. 2012. Landscape of somatic retrotransposition in human cancers. *Science* **337**: 967–71.  
660 <http://www.ncbi.nlm.nih.gov/pubmed/22745252> (Accessed April 27, 2018).

- 661 Lee J, Cordaux R, Han K, Wang J, Hedges DJ, Liang P, Batzer MA. 2007. Different evolutionary fates of  
662 recently integrated human and chimpanzee LINE-1 retrotransposons. *Gene* **390**: 18–27.  
663 <http://www.ncbi.nlm.nih.gov/pubmed/17055192> (Accessed April 30, 2018).
- 664 Lerat E, Fablet M, Modolo L, Lopez-Maestre H, Vieira C. 2016. TETools facilitates big data expression  
665 analysis of transposable elements and reveals an antagonism between their activity and that of  
666 piRNA genes. *Nucleic Acids Res* **45**: gkw953. [https://academic.oup.com/nar/article-](https://academic.oup.com/nar/article-lookup/doi/10.1093/nar/gkw953)  
667 [lookup/doi/10.1093/nar/gkw953](https://academic.oup.com/nar/article-lookup/doi/10.1093/nar/gkw953) (Accessed April 16, 2018).
- 668 Li B, Dewey CN. 2011. RSEM: accurate transcript quantification from RNA-Seq data with or without a  
669 reference genome. *BMC Bioinformatics* **12**: 323.  
670 <http://bmcbioinformatics.biomedcentral.com/articles/10.1186/1471-2105-12-323> (Accessed April  
671 30, 2018).
- 672 Li B, Ruotti V, Stewart RM, Thomson JA, Dewey CN. 2010. RNA-Seq gene expression estimation with  
673 read mapping uncertainty. *Bioinformatics* **26**: 493–500.  
674 <https://academic.oup.com/bioinformatics/article-lookup/doi/10.1093/bioinformatics/btp692>  
675 (Accessed April 17, 2018).
- 676 Li H, Handsaker B, Wysoker A, Fennell T, Ruan J, Homer N, Marth G, Abecasis G, Durbin R, 1000  
677 Genome Project Data Processing Subgroup 1000 Genome Project Data Processing. 2009. The  
678 Sequence Alignment/Map format and SAMtools. *Bioinformatics* **25**: 2078–9.  
679 <http://www.ncbi.nlm.nih.gov/pubmed/19505943> (Accessed April 30, 2018).
- 680 Love MI, Huber W, Anders S. 2014. Moderated estimation of fold change and dispersion for RNA-seq  
681 data with DESeq2. *Genome Biol* **15**: 550. <http://www.ncbi.nlm.nih.gov/pubmed/25516281>  
682 (Accessed April 17, 2018).
- 683 Mir AA, Philippe C, Cristofari G. 2015. euL1db: the European database of L1HS retrotransposon  
684 insertions in humans. *Nucleic Acids Res* **43**: D43-7. <http://www.ncbi.nlm.nih.gov/pubmed/25352549>

- 685 (Accessed May 1, 2018).
- 686 Payer LM, Steranka JP, Yang WR, Kryatova M, Medabalimi S, Ardeljan D, Liu C, Boeke JD,  
687 Avramopoulos D, Burns KH. 2017. Structural variants caused by Alu insertions are associated with  
688 risks for many human diseases. *Proc Natl Acad Sci U S A* **114**: E3984–E3992.  
689 <http://www.ncbi.nlm.nih.gov/pubmed/28465436> (Accessed April 30, 2018).
- 690 Perepelitsa-Belancio V, Deininger P. 2003. RNA truncation by premature polyadenylation attenuates  
691 human mobile element activity. *Nat Genet* **35**: 363–366. <http://www.nature.com/articles/ng1269>  
692 (Accessed May 1, 2018).
- 693 Pertea M, Pertea GM, Antonescu CM, Chang T-C, Mendell JT, Salzberg SL. 2015. StringTie enables  
694 improved reconstruction of a transcriptome from RNA-seq reads. *Nat Biotechnol* **33**: 290–295.  
695 <http://www.nature.com/articles/nbt.3122> (Accessed April 20, 2018).
- 696 Philippe C, Vargas-Landin DB, Doucet AJ, van Essen D, Vera-Otarola J, Kuciak M, Corbin A,  
697 Nigumann P, Cristofari G. 2016. Activation of individual L1 retrotransposon instances is restricted  
698 to cell-type dependent permissive loci. *Elife* **5**: e13926. <https://elifesciences.org/content/5/e13926v1>  
699 (Accessed March 29, 2016).
- 700 Pitkänen E, Cajuso T, Katainen R, Kaasinen E, Välimäki N, Palin K, Taipale J, Aaltonen LA, Kilpivaara  
701 O. 2014. Frequent L1 retrotranspositions originating from TTC28 in colorectal cancer. *Oncotarget*  
702 **5**: 853–9. <http://www.ncbi.nlm.nih.gov/pubmed/24553397> (Accessed April 29, 2018).
- 703 Pruitt KD, Brown GR, Hiatt SM, Thibaud-Nissen F, Astashyn A, Ermolaeva O, Farrell CM, Hart J,  
704 Landrum MJ, McGarvey KM, et al. 2014. RefSeq: an update on mammalian reference sequences.  
705 *Nucleic Acids Res* **42**: D756–63.  
706 [http://www.pubmedcentral.nih.gov/articlerender.fcgi?artid=3965018&tool=pmcentrez&rendertype=](http://www.pubmedcentral.nih.gov/articlerender.fcgi?artid=3965018&tool=pmcentrez&rendertype=abstract)  
707 abstract (Accessed February 16, 2016).

- 708 Quinlan AR, Hall IM. 2010. BEDTools: a flexible suite of utilities for comparing genomic features.  
709 *Bioinformatics* **26**: 841–2. <http://bioinformatics.oxfordjournals.org/content/26/6/841.abstract>  
710 (Accessed July 9, 2014).
- 711 R Development Core Team R. 2011. R: A Language and Environment for Statistical Computing ed.  
712 R.D.C. Team. *R Found Stat Comput* **1**: 409. <http://www.r-project.org>.
- 713 Robinson JT, Thorvaldsdóttir H, Winckler W, Guttman M, Lander ES, Getz G, Mesirov JP. 2011.  
714 Integrative genomics viewer. *Nat Biotechnol* **29**: 24–6. <http://dx.doi.org/10.1038/nbt.1754>  
715 (Accessed November 19, 2014).
- 716 Rodić N, Steranka JP, Makohon-Moore A, Moyer A, Shen P, Sharma R, Kohutek ZA, Huang CR, Ahn D,  
717 Mita P, et al. 2015. Retrotransposon insertions in the clonal evolution of pancreatic ductal  
718 adenocarcinoma. *Nat Med* **21**: 1060–4. <http://www.ncbi.nlm.nih.gov/pubmed/26259033> (Accessed  
719 April 27, 2018).
- 720 Rosenbloom KR, Armstrong J, Barber GP, Casper J, Clawson H, Diekhans M, Dreszer TR, Fujita PA,  
721 Guruvadoo L, Haeussler M, et al. 2014. The UCSC Genome Browser database: 2015 update.  
722 *Nucleic Acids Res* **43**: D670-81.  
723 [http://www.pubmedcentral.nih.gov/articlerender.fcgi?artid=4383971&tool=pmcentrez&rendertype=](http://www.pubmedcentral.nih.gov/articlerender.fcgi?artid=4383971&tool=pmcentrez&rendertype=abstract)  
724 [abstract](http://www.pubmedcentral.nih.gov/articlerender.fcgi?artid=4383971&tool=pmcentrez&rendertype=abstract) (Accessed January 7, 2015).
- 725 Saito T, Rehmsmeier M. 2015. The Precision-Recall Plot Is More Informative than the ROC Plot When  
726 Evaluating Binary Classifiers on Imbalanced Datasets ed. G. Brock. *PLoS One* **10**: e0118432.  
727 <http://dx.plos.org/10.1371/journal.pone.0118432> (Accessed April 17, 2018).
- 728 Schwahn U, Lenzner S, Dong J, Feil S, Hinzmann B, van Duijnhoven G, Kirschner R, Hemberger M,  
729 Bergen AAB, Rosenberg T, et al. 1998. Positional cloning of the gene for X-linked retinitis  
730 pigmentosa 2. *Nat Genet* **19**: 327–332. [http://www.nature.com/articles/ng0898\\_327](http://www.nature.com/articles/ng0898_327) (Accessed April  
731 29, 2018).



- 732 Scott EC, Gardner EJ, Masood A, Chuang NT, Vertino PM, Devine SE. 2016. A hot L1 retrotransposon  
733 evades somatic repression and initiates human colorectal cancer. *Genome Res* **26**: 745–55.  
734 <http://www.ncbi.nlm.nih.gov/pubmed/27197217> (Accessed April 19, 2018).
- 735 Smit, AFA, Hubley, R & Green P. RepeatMasker Open-4.0. 2013-2015. <http://www.repeatmasker.org>  
736 (Accessed April 21, 2018).
- 737 Smit AFA, Tóth G, Riggs AD, Jurka J. 1995. Ancestral, Mammalian-wide Subfamilies of LINE-1  
738 Repetitive Sequences. *J Mol Biol* **246**: 401–417.  
739 <https://www.sciencedirect.com/science/article/pii/S0022283684700957?via%3Dihub> (Accessed  
740 April 30, 2018).
- 741 Sorek R, Ast G, Graur D. 2002. Alu-containing exons are alternatively spliced. *Genome Res* **12**: 1060–7.  
742 <http://www.ncbi.nlm.nih.gov/pubmed/12097342> (Accessed May 1, 2018).
- 743 Stewart C, Kural D, Strömberg MP, Walker JA, Konkel MK, Stütz AM, Urban AE, Grubert F, Lam  
744 HYK, Lee WP, et al. 2011. A comprehensive map of mobile element insertion polymorphisms in  
745 humans ed. H.S. Malik. *PLoS Genet* **7**: e1002236. <http://www.ncbi.nlm.nih.gov/pubmed/21876680>  
746 (Accessed April 19, 2018).
- 747 Stower H. 2013. Alternative splicing: Regulating Alu element “exonization”. *Nat Rev Genet* **14**: 152–3.  
748 <http://dx.doi.org/10.1038/nrg3428> (Accessed March 4, 2016).
- 749 Sudmant PH, Rausch T, Gardner EJ, Handsaker RE, Abyzov A, Huddleston J, Zhang Y, Ye K, Jun G,  
750 Hsi-Yang Fritz M, et al. 2015. An integrated map of structural variation in 2,504 human genomes.  
751 *Nature* **526**: 75–81. <http://www.nature.com/doi/10.1038/nature15394> (Accessed April 19,  
752 2018).
- 753 Taylor MS, LaCava J, Mita P, Molloy KR, Huang CRL, Li D, Adney EM, Jiang H, Burns KH, Chait BT,  
754 et al. 2013. Affinity Proteomics Reveals Human Host Factors Implicated in Discrete Stages of

- 755 LINE-1 Retrotransposition. *Cell* **155**: 1034–1048. <http://www.ncbi.nlm.nih.gov/pubmed/24267889>  
756 (Accessed April 20, 2018).
- 757 Tubio JMC, Li Y, Ju YS, Martincorena I, Cooke SL, Tojo M, Gundem G, Pipinikas CP, Zamora J, Raine  
758 K, et al. 2014. Mobile DNA in cancer. Extensive transduction of nonrepetitive DNA mediated by L1  
759 retrotransposition in cancer genomes. *Science* **345**: 1251343.  
760 <http://www.ncbi.nlm.nih.gov/pubmed/25082706> (Accessed April 29, 2018).
- 761 Upton KR, Gerhardt DJ, Jesuadian JS, Richardson SR, Sánchez-Luque FJ, Bodea GO, Ewing AD,  
762 Salvador-Palomeque C, van der Knaap MS, Brennan PM, et al. 2015. Ubiquitous L1 mosaicism in  
763 hippocampal neurons. *Cell* **161**: 228–39. <http://www.ncbi.nlm.nih.gov/pubmed/25860606> (Accessed  
764 April 27, 2018).
- 765 Wang J, Song L, Grover D, Azrak S, Batzer MA, Liang P. 2006. dbRIP: A highly integrated database of  
766 retrotransposon insertion polymorphisms in humans. *Hum Mutat* **27**: 323–329.  
767 <http://www.ncbi.nlm.nih.gov/pubmed/16511833> (Accessed May 1, 2018).
- 768 Wicker T, Sabot F, Hua-Van A, Bennetzen JL, Capy P, Chalhoub B, Flavell A, Leroy P, Morgante M,  
769 Panaud O, et al. 2007. A unified classification system for eukaryotic transposable elements. *Nat Rev*  
770 *Genet* **8**: 973–82. <http://dx.doi.org/10.1038/nrg2165> (Accessed March 15, 2016).
- 771 Xie M, Hong C, Zhang B, Lowdon RF, Xing X, Li D, Zhou X, Lee HJ, Maire CL, Ligon KL, et al. 2013.  
772 DNA hypomethylation within specific transposable element families associates with tissue-specific  
773 enhancer landscape. *Nat Genet* **45**: 836–41. <http://dx.doi.org/10.1038/ng.2649> (Accessed July 22,  
774 2015).
- 775 Yue F, Cheng Y, Breschi A, Vierstra J, Wu W, Ryba T, Sandstrom R, Ma Z, Davis C, Pope BD, et al.  
776 2014. A comparative encyclopedia of DNA elements in the mouse genome. *Nature* **515**: 355–364.  
777 <http://www.ncbi.nlm.nih.gov/pubmed/25409824> (Accessed April 18, 2018).

778

779

780
